# Supplementary material
Source: PubMed Central journal article supplement (PMC4784835)

Figure 1

Frequent hip pain and radiographic  
hip OA in Framingham

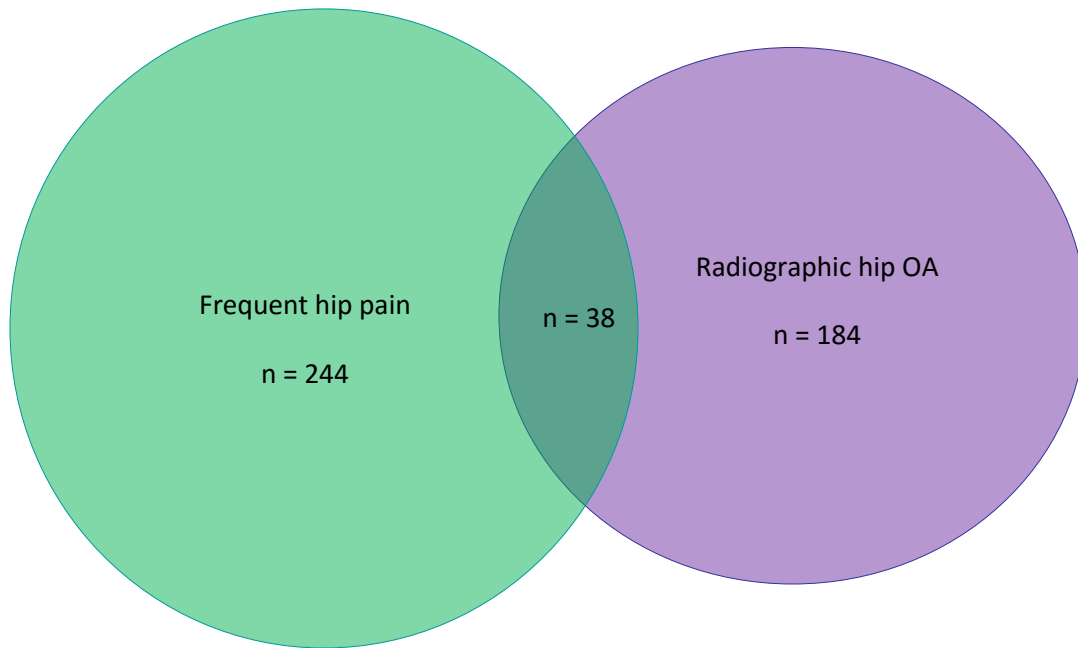

Supplement: kimc027512.wf1_default.pdf [file kimc027512.wf1_default.pdf]

Figure 2

Frequent hip pain and radiographic hip OA in  
Osteoarthritis Initiative

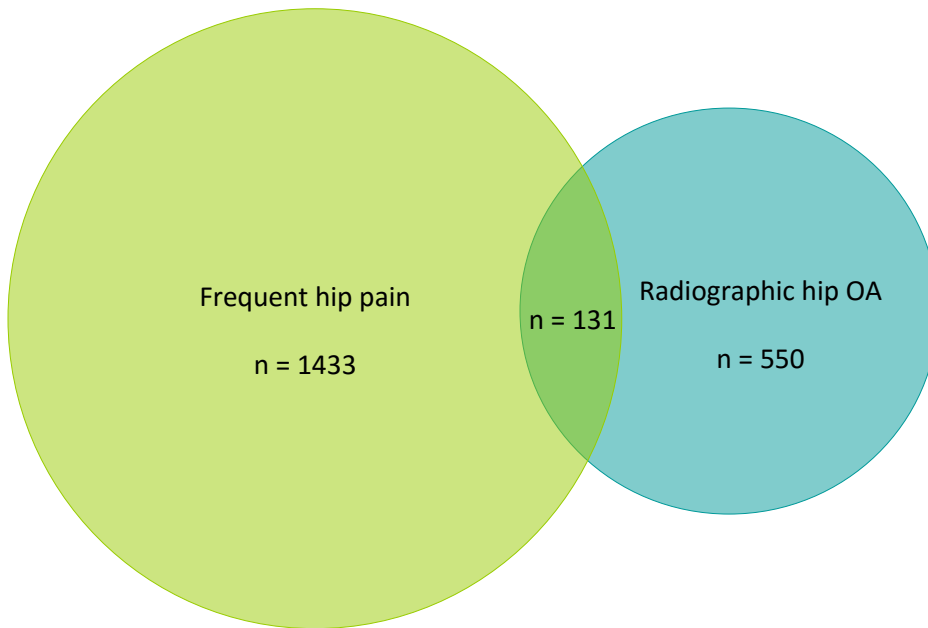

Supplement: kimc027512.wf2_default.pdf [file kimc027512.wf2_default.pdf]
